# Supplementary material for: Impact of pre-diagnostic triglycerides and HDL-cholesterol on breast cancer recurrence and survival by breast cancer subtypes
Source: Springer Nature journal article supplement (doi:10.1186/s12885-018-4568-2), 2018-06-15
Supplement: MOESM3 [file 15848848]

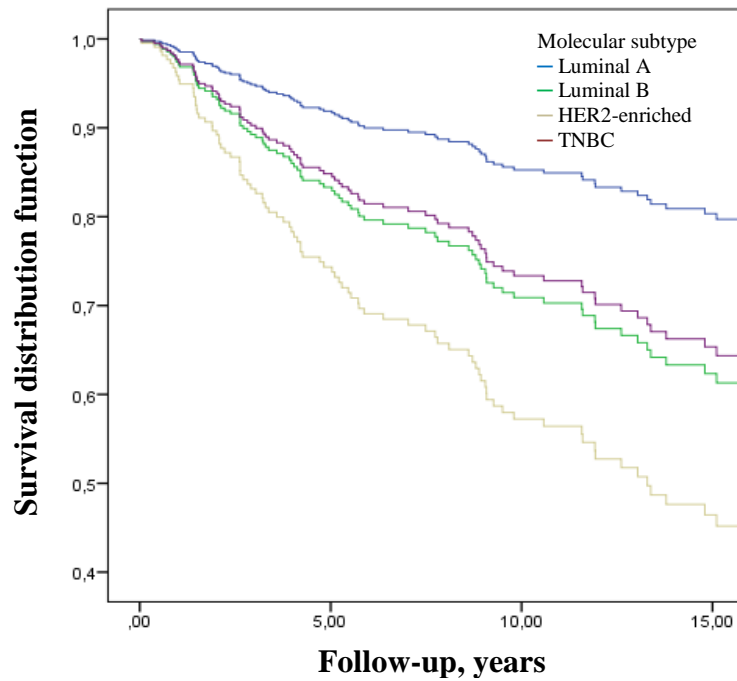

**Supplementary figure 2** Age-adjusted breast cancer-free interval by breast cancer molecular subtypes<sup>a</sup>

<sup>a</sup> Luminal A - ER positive, PR positive, HER2 negative, and Ki-67 <20%; Luminal B - ER positive and/or PR positive, HER2 positive (or HER2 negative and Ki-67 ≥20% or PR negative); HER2-enriched - ER negative, PR negative, and HER2 positive; and TNBC - ER negative, PR negative and HER2 negative.

Abbreviations: ER, estrogen receptor; HER2, human epidermal growth factor receptor-2; PR, progesterone receptor; TNBC, triple negative breast cancer.
